# Supplementary material for: Suppression of BMP-7 by histone deacetylase 2 promoted apoptosis of renal tubular epithelial cells in acute kidney injury
Source: PubMed Central journal article supplement (PMC5680919; doi:10.1038/cddis.2017.552), 2017-10-26
Supplement: cddis2017552x2.pdf [file cddis2017552x2.pdf]

## Suppliment information

### The primer sets

| name         | Forward primer                 | Reverse primer                | NCBI Reference Sequence |
|--------------|--------------------------------|-------------------------------|-------------------------|
| mouse HDAC1  | 5'GACCCTGACAAAC<br>GCATCTC3'   | 5'GTTCTTGCGACCAC<br>CTTCTC3'  | NM_008228.2             |
| mouse HDAC2  | 5'CATATGCACCTGGT<br>GTTCAA3'   | 5'TCGCAAGCTATCCG<br>TTTGTC3'  | NM_008229.2             |
| mouse HDAC3  | 5'AGTTCTGCTCCCGT<br>TACACA3'   | 5'AGAAGCCAGAGGC<br>CTCAAAT3'  | NM_010411.2             |
| mouse HDAC4  | 5'GAAACGAGCTTGA<br>GCCTCTG3'   | 5'GCCAGTACTTGCTG<br>TGGATG3'  | NM_207225.2             |
| mouse HDAC5  | 5'GTGGCAGTGGAGGT<br>GAAGCC3'   | 5'GCAGGGTCCATGGG<br>GCCCGC3'  | NM_001284248.1          |
| mouse HDAC6  | 5'CCAGCCTCGCATAC<br>AAACAA3'   | 5'ATCATGGGCTTCCT<br>CTGCTT3'  | NM_001130416.1          |
| mouse HDAC7  | 5'GGACGTTTGTGATG<br>CTACCC3'   | 5'CGGGAAGCTACTTT<br>GAAGGC3'  | NM_001204281.1          |
| mouse HDAC8  | 5'TGCAGCAGCTATAG<br>GAGGAG3'   | 5'ACCCTCCAGACCAG<br>TTGATG3'  | NM_027382.4             |
| mouse HDAC9  | 5'ACAACCTCCAGGAGC<br>ACATCA3'  | 5'GCGATGCCTCTCTA<br>CTTCCT3'  | NM_001271386.1          |
| mouse HDAC10 | 5'TCCAGGATGAGGAT<br>CTTGCC3'   | 5'GCTAGGCATCGCTG<br>AATGAG3'  | NR_028449.1             |
| mouse HDAC11 | 5'AAGAGAAGCTGCT<br>GTCCGAT3'   | 5'ACCACTTCAGCTCG<br>TTGAGA3'  | NM_144919.2             |
| Human HDAC1  | 5'ATTATGGACAAGGC<br>CACCCA3'   | 5'TCATCGCTGTGGTA<br>CTTGGT3'  | NM_004964.2             |
| Human HDAC2  | 5'GATGTICTGGCATC<br>CTCCCT3'   | 5'TGTTCCATCTCCTCC<br>ATCCAC3' | NM_001527.3             |
| Human HDAC3  | 5'CATCTCTGCAAGGA<br>GCAACC3'   | 5'GAGGCCTCAAACCT<br>CTTGGC3'  | NM_003883.3             |
| Human HDAC4  | 5'CAAAGACCCAATGC<br>AAACGC3'   | 5'GCTTCTTCGTTCTC<br>GCAAGT3'  | NM_006037.3             |
| Human HDAC5  | 5'TACAGCCTTCAGGA<br>CAGTGG3'   | 5'ATCTGGCGGTGACA<br>GAGTAG3'  | NM_001015053.1          |
| Human HDAC6  | 5'CCAGGCTTCAGTTT<br>5'CCTGTG3' | 5'TGTCCTCCTCCATG<br>TTGTCC3'  | NM_001321229.1          |
| Human HDAC7  | 5'TGAGTACCTGGCTG<br>CTTTCA3'   | 5'GCAGCATCAAATCC<br>AGCAGA3'  | NM_001308090.1          |
| Human HDAC8  | 5'CTCCAGAAGGTCAG<br>CCAAGA3'   | 5'GGCAGCTGTGATCG<br>TAGCCC3'  | NM_018486.2             |
| Human HDAC9  | 5'CCATCCCAAGCTCT<br>GGTACA3'   | 5'TGCATCTTGTGCTC<br>CTGGTA3'  | NM_058176.2             |
| Human HDAC10 | 5'TGCACAGCCCAGAG<br>TATGTA3'   | 5'AGTAGATGGCGTCG<br>AACTGT3'  | NM_032019.5             |
| Human HDAC11 | 5'GCCCATCCTTATGGT<br>GACCT3'   | 5'GGTGTGTCTGAGTT<br>CTGTGC3'  | NM_024827.3             |
